# Supplementary material for: The development and validation of a m6A-lncRNAs based prognostic model for overall survival in lung squamous cell carcinoma
Source: PubMed Central journal article supplement — J Thorac Dis. 2022 Oct;14(10):4055–72. doi: 10.21037/jtd-22-1185 (PMC9641337; doi:10.21037/jtd-22-1185), 2022-10
Supplement: jtd-14-10-4055-supplementary.pdf [file jtd-14-10-4055-supplementary.pdf]

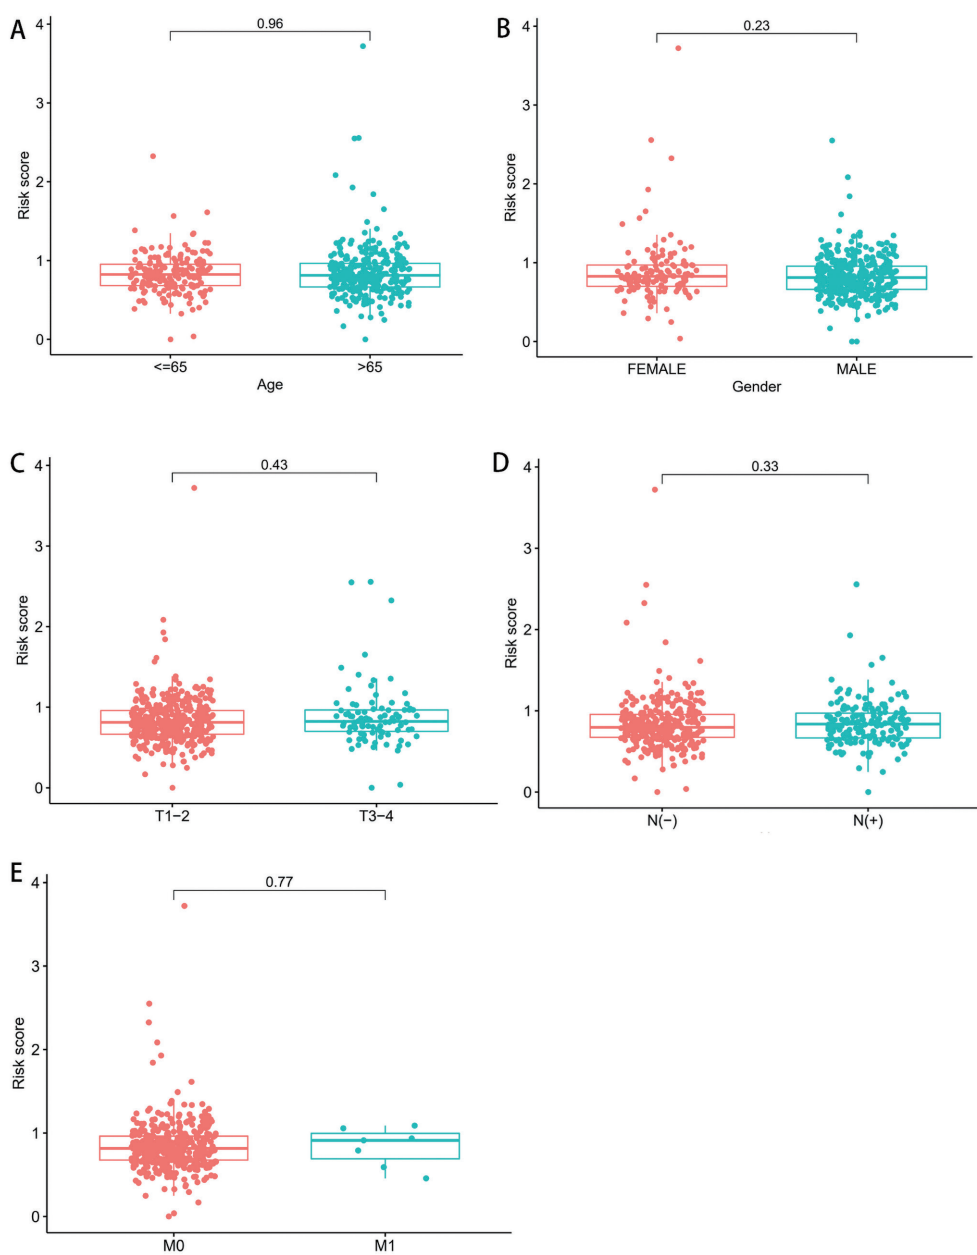

**Figure S1** Comparison of risk scores of patients in different clinical characteristic subgroups. (A) Age; (B) gender; (C) T stage; (D) lymph node invasion; (E) metastasis.
